# Supplementary material for: Ethanol Extract of Illicium henryi Attenuates LPS-Induced Acute Kidney Injury in Mice via Regulating Inflammation and Oxidative Stress
Source: PubMed Central journal article supplement (PMC6627762; doi:10.3390/nu11061412), 2019-06-23
Supplement: nutrients-11-01412-s001.pdf [file nutrients-11-01412-s001.pdf]

## Supplementary Materials

**Table S1.** The in vitro antioxidant activity of EEIH.

| Plant Extract         | ABTS          | DPPH        | FRP          |
|-----------------------|---------------|-------------|--------------|
| Activities (mg VCE/g) | 141.55 ± 7.39 | 22.0 ± 1.26 | 10.05 ± 0.07 |

The values are expressed as mean ± SD ( $n = 3$ ). ABTS: ABTS radical scavenging activity; DPPH:

DPPH radical scavenging activity; FRP: ferric reducing power; VCE: vitamin C equivalents;
